# Supplementary material
Source: PubMed Central journal article supplement (PMC9070804)
Supplement: kiac040_supplementary_data.pdf [file kiac040_supplementary_data.pdf]

## SUPPLEMENTAL DATA

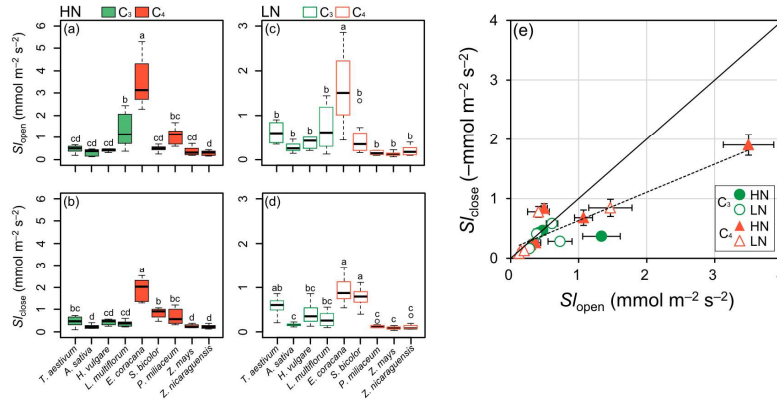

**Supplemental Fig. S1.** Maximum slope of the response of stomatal conductance ( $g_s$ ) to the increased photosynthetically active photon flux density (PPFD) ( $S_{l_{open}}$ ) and that to the decreased PPFD ( $S_{l_{close}}$ ) in four C<sub>3</sub> and five C<sub>4</sub> species grown under high nitrogen (N) (HN) or low N (LN) conditions. (a-e) Green and orange boxes indicate C<sub>3</sub> and C<sub>4</sub> species, respectively. Significant differences between the species were determined using ANOVA followed by Tukey's test ( $P < 0.05$ ) and are indicated by different letters. Data are the mean  $\pm$  SE ( $n = 4$ ). (e) In the relationship between  $S_{l_{close}}$  and  $S_{l_{open}}$ , solid and dotted lines represent regression line ( $R^2 = 0.77$ ,  $P < 0.01$ ) and 1:1 line, respectively.

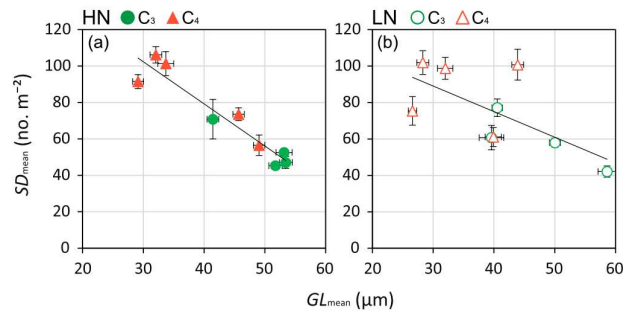

**Supplemental Fig. S2.** Relationship between mean stomatal density ( $SD_{\text{mean}}$ ) and mean guard cell length ( $GL_{\text{mean}}$ ) in four  $C_3$  and five  $C_4$  species grown under (a) high nitrogen (N) (HN) or (b) low N (LN) conditions. Green and orange symbols indicate  $C_3$  and  $C_4$  species, respectively, and filled and open symbols indicate plants grown under HN and LN conditions, respectively. Regression lines are shown for all  $C_3$  and  $C_4$  species. Values of  $R^2$  are (a) 0.90 ( $P < 0.01$ ) and (b) 0.45 ( $P < 0.05$ ). Data are the mean  $\pm$  SE ( $n = 4$ ).

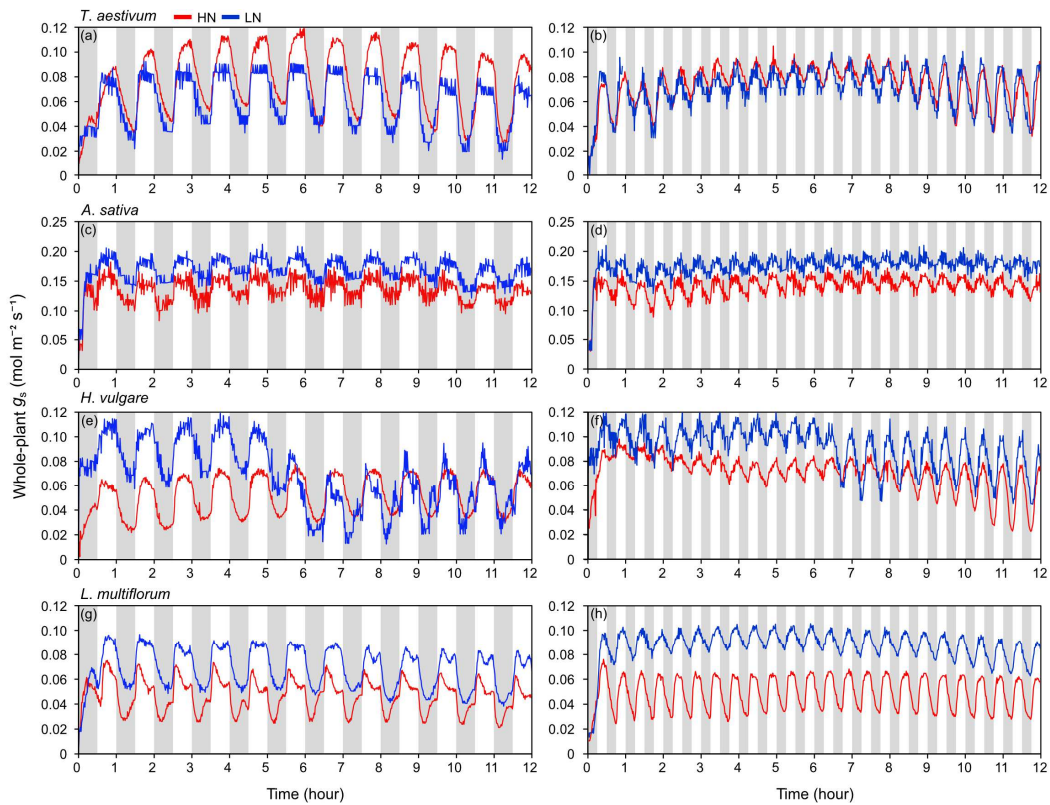

**Supplemental Fig. S3.** Dynamics of the whole-plant stomatal conductance ( $g_s$ ) in the controlled fluctuating light environments in four  $C_3$  species. Light intensity was alternately changed between low ( $80 \mu\text{mol m}^{-2} \text{s}^{-1}$  photosynthetically active photon flux density (PPFD) at 30 cm above the pot surface, grey area) and high ( $300 \mu\text{mol m}^{-2} \text{s}^{-1}$  PPFD at 30 cm above the pot surface, white area) at 30-min intervals (a, c, e, g) and 15-min intervals (b, d, f, h) for a total of 12 hours. Red and blue lines represent plants grown under high nitrogen (N) (HN) and low N (LN) conditions, respectively. Data are the mean of four pot plants on the balance.

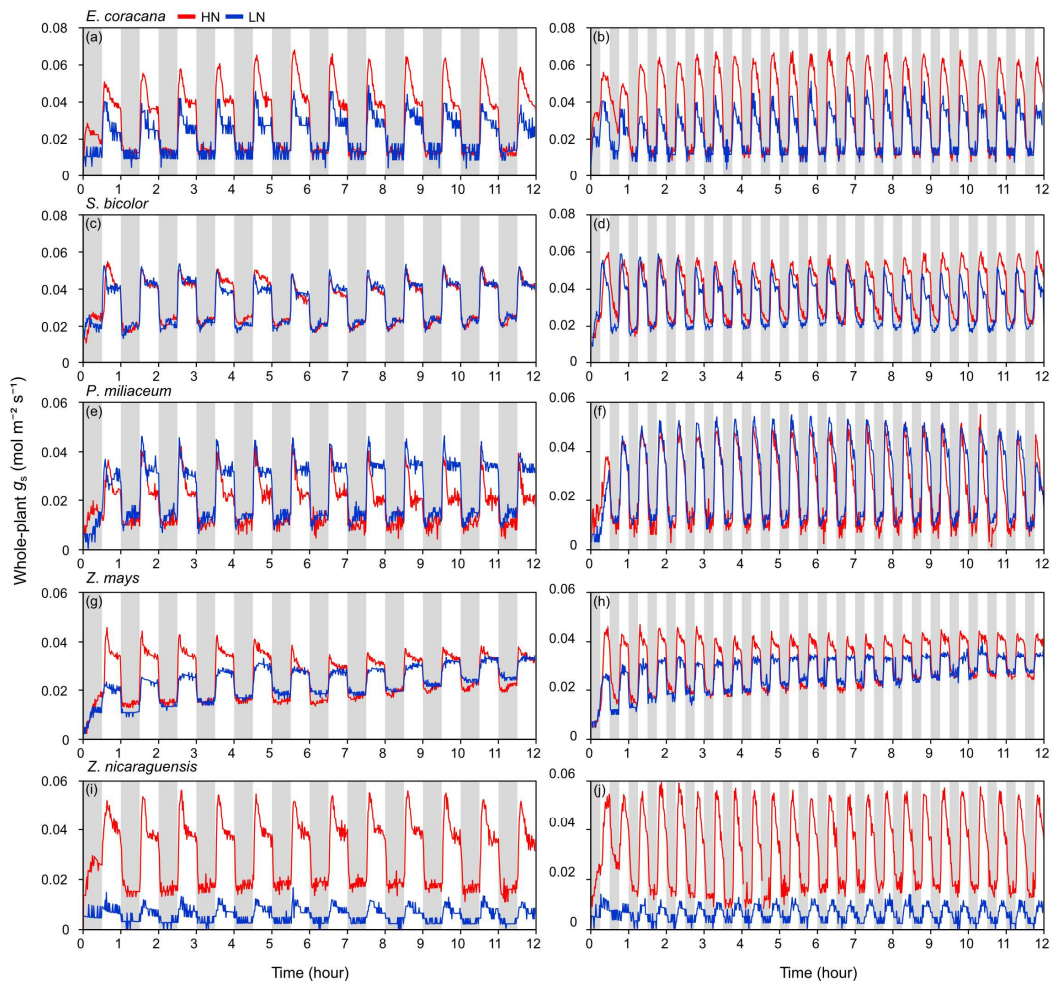

**Supplemental Fig. S4.** Dynamics of the whole-plant stomatal conductance ( $g_s$ ) in the controlled fluctuating light environments in five  $C_4$  species. Light intensity was alternately changed between low ( $80 \mu\text{mol m}^{-2} \text{s}^{-1}$  photosynthetically active photon flux density (PPFD) at 30 cm above the pot surface, grey area) and high ( $300 \mu\text{mol m}^{-2} \text{s}^{-1}$  PPFD at 30 cm above the pot surface, white area) at 30-min intervals (a, c, e, g, i) and 15-min intervals (b, d, f, h, j) for a total of 12 hours. Red and blue lines represent plants grown under high nitrogen (N) (HN) and low N (LN) conditions, respectively. Data are the mean of four pot plants on the balance.

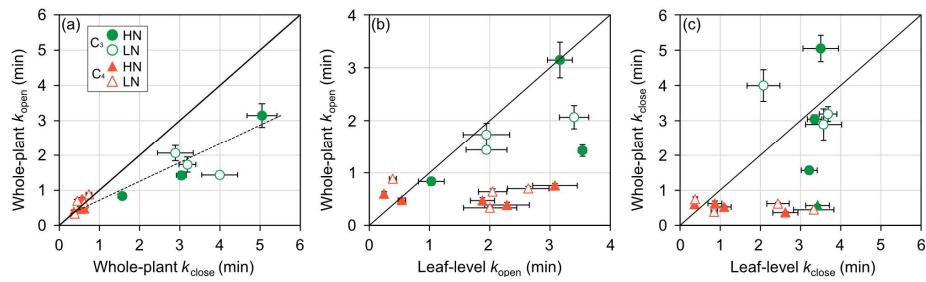

**Supplemental Fig. S5.** Relationship between whole-plant and leaf-level stomatal characteristics in four C<sub>3</sub> and five C<sub>4</sub> species grown under high nitrogen (N) (HN) or low N (LN) conditions. Green and orange symbols indicate C<sub>3</sub> and C<sub>4</sub> species, respectively, and filled and open symbols indicate plants grown under HN and LN conditions, respectively. (a) Relationships between whole-plant  $k_{open}$  and  $k_{close}$ , (b) whole-plant  $k_{open}$  and leaf-level  $k_{open}$ , and (c) whole-plant  $k_{close}$  and leaf-level  $k_{close}$ . Note that whole-plant  $k_{open}$  and  $k_{close}$  were obtained when photosynthetically active photon flux density (PPFD) varied between 80 and 300  $\mu\text{mol m}^{-2} \text{s}^{-1}$ , whereas leaf-level  $k_{open}$  and  $k_{close}$  were obtained when PPFD varied between 100 and 1000  $\mu\text{mol m}^{-2} \text{s}^{-1}$ . Regression line is shown for all C<sub>3</sub> and C<sub>4</sub> species. Value of  $R^2$  is (a) 0.85 ( $P < 0.01$ ). Data are the mean of twelve measurements during the 12-hour light period  $\pm$  SE for whole-plant  $k_{open}$  and  $k_{close}$ . Data are the mean  $\pm$  SE ( $n = 4$ ) for leaf-level  $k_{open}$  and  $k_{close}$ .

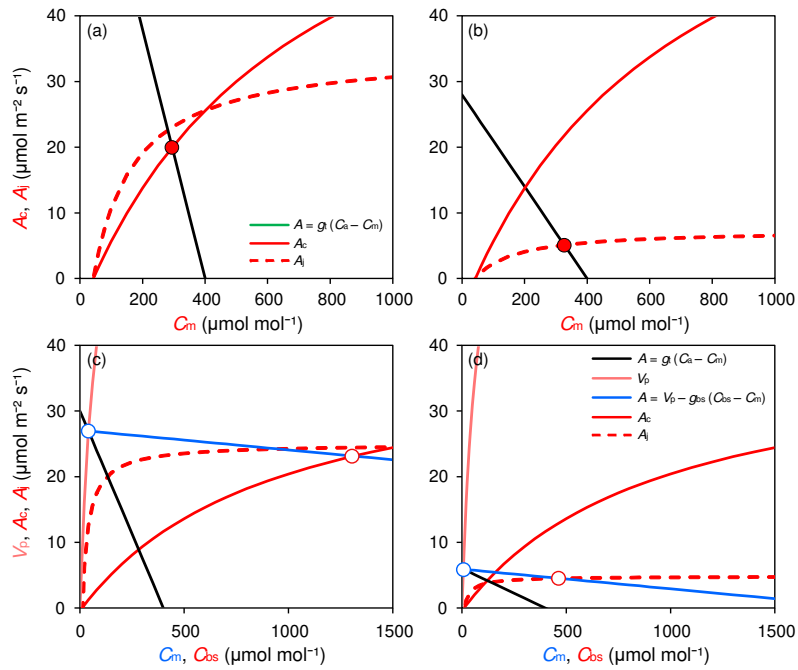

**Supplemental Fig. S6.** Relationship between the CO<sub>2</sub> assimilation rate ( $A_c$ ,  $A_j$ ,  $V_p$ ) and CO<sub>2</sub> concentration in mesophyll cells ( $C_m$ ) or bundle sheath cells ( $C_{bs}$ ) described by the C<sub>3</sub> or C<sub>4</sub> photosynthesis models. In the C<sub>3</sub> photosynthesis model (a, b), the operating point of photosynthesis in mesophyll cells (filled red circles) is given by the intersection of the supply function ( $A = g_t(C_a - C_m)$ ) and the demand function (minimum of either  $A_c$  or  $A_j$ ). (a)  $g_s$  is 0.36 at the photosynthetically active photon flux density (PPFD) of 1000  $\mu\text{mol m}^{-2} \text{s}^{-1}$ , and (b)  $g_s$  is 0.15 at the PPFD of 100  $\mu\text{mol m}^{-2} \text{s}^{-1}$ . In the C<sub>4</sub> photosynthesis model (c, d), PEP carboxylation rate (blue circle) is given by the intersection of the supply function ( $A = g_t(C_a - C_m)$ ) and  $V_p$ , and the operating point of photosynthesis in the bundle cell (red circles) is given by the intersection of another supply function ( $A = V_p - g_{bs}(C_{bs} - C_m)$ ) and the demand function (minimum of either  $A_c$  or  $A_j$ ). (c)  $g_s$  is 0.16 at the PPFD of 1000  $\mu\text{mol m}^{-2} \text{s}^{-1}$ , and (d)  $g_s$  is 0.02 at the PPFD of 100  $\mu\text{mol m}^{-2} \text{s}^{-1}$ . Model parameters were listed in Table 1.

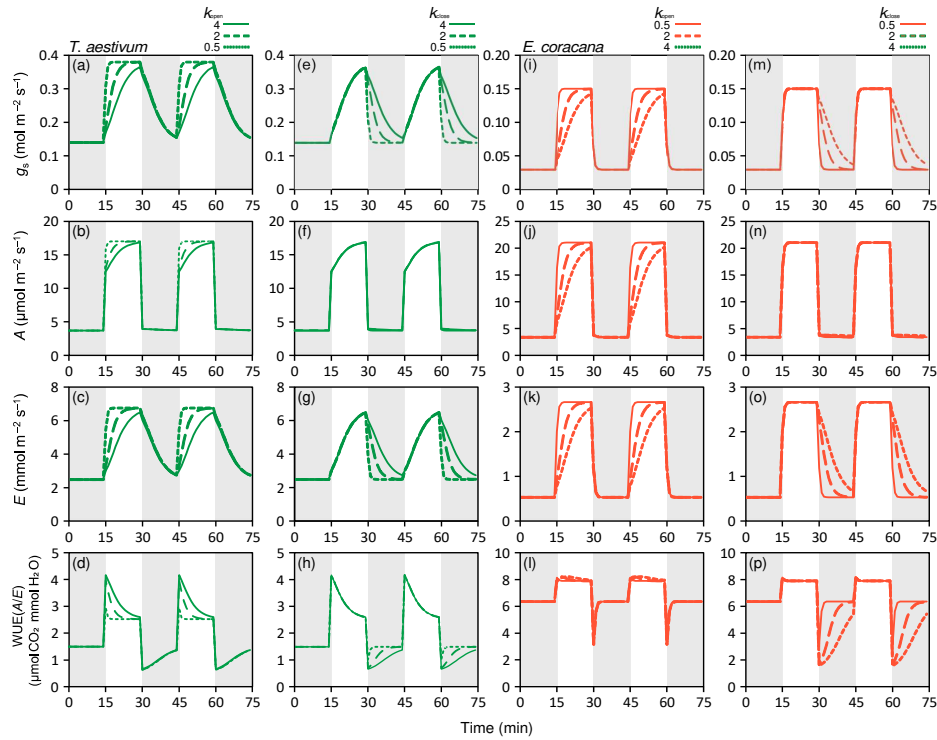

**Supplemental Fig. S7.** Changes in stomatal conductance ( $g_s$ ), photosynthetic rate ( $A$ ), transpiration rate ( $E$ ), and water use efficiency ( $WUE$ ,  $A/E$ ) in the controlled fluctuating light environments simulated by the dynamic photosynthesis model in *T. aestivum* (a-h) and *E. coracana* (i-p) grown under high N conditions. In *T. aestivum*, solid, broken, and dotted lines are simulated results at  $k_{open}$  of 4, 2, and 0.5, respectively, at the constant  $k_{close}$  of 4 (a-d), and those are simulated results at  $k_{close}$  of 4, 2, and 0.5, respectively, at the constant  $k_{open}$  of 4 (e-h). In *E. coracana*, solid, broken, and dotted lines are simulated results at  $k_{open}$  of 0.5, 2, and 4, respectively, at the constant  $k_{close}$  of 0.5 (i-l), and those are simulated results at  $k_{close}$  of 0.5, 2, and 4, respectively, at the constant  $k_{open}$  of 0.5 (m-p). Other parameters used for the simulation were listed in Table 1. For each combination of  $k_{open}$  and  $k_{close}$ ,  $A_{total}$  and  $E_{total}$  were calculated.

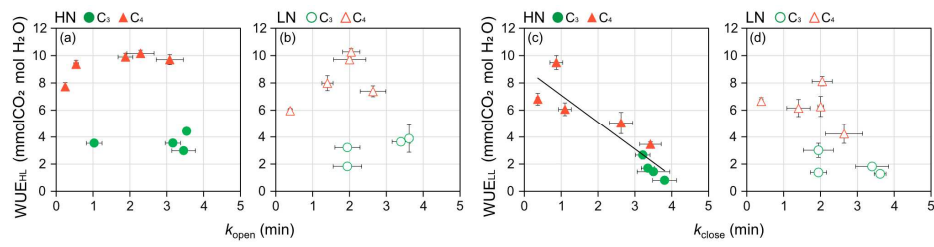

**Supplemental Fig. S8.** Relationship between water use efficiency during high (WUE<sub>HL</sub>) and low light period (WUE<sub>LL</sub>) and time constants for stomatal opening ( $k_{open}$ ) and closure ( $k_{close}$ ) in four C<sub>3</sub> and five C<sub>4</sub> species grown under (a, c) high nitrogen (N) (HN) or (b, d) low N (LN) conditions. Green and orange symbols indicate C<sub>3</sub> and C<sub>4</sub> species, respectively, and filled and open symbols indicate plants grown under HN and LN conditions, respectively. Regression line is shown for all C<sub>3</sub> and C<sub>4</sub> species. Value of  $R^2$  is (c) 0.82 ( $P < 0.01$ ). Data are the mean  $\pm$  SE ( $n = 4$ ).



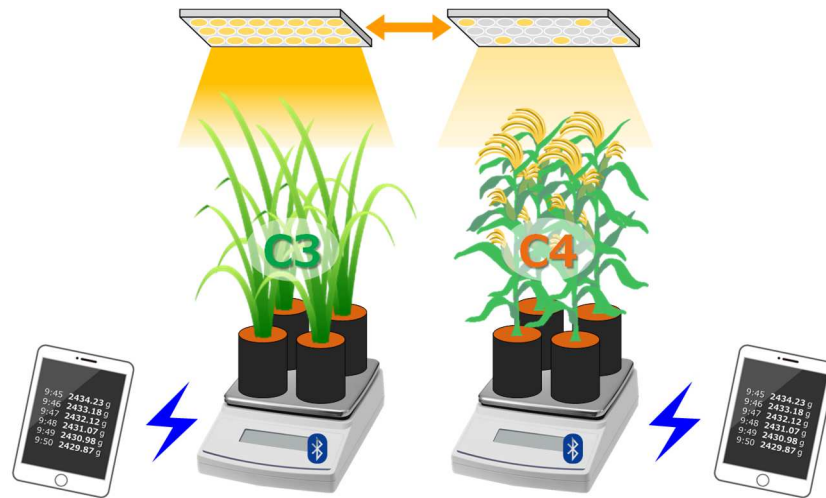

**Supplemental Fig. S9.** Experimental design for evaluating whole-plant water consumption in the controlled fluctuating light environments. In the temperature-controlled growth room, light intensity was alternately changed between low ( $80 \mu\text{mol m}^{-2} \text{s}^{-1}$  photosynthetically active photon flux density (PPFD) at 30 cm above the pot surface) and high ( $300 \mu\text{mol m}^{-2} \text{s}^{-1}$  PPFD at 30 cm above the pot surface) at 30-min intervals on the first day and 15-min intervals on the second day. For each species, four pots were placed on a Bluetooth communication electronic balance with the minimum unit of 0.01 g, which are connected to a recording device with an automatic logging application.

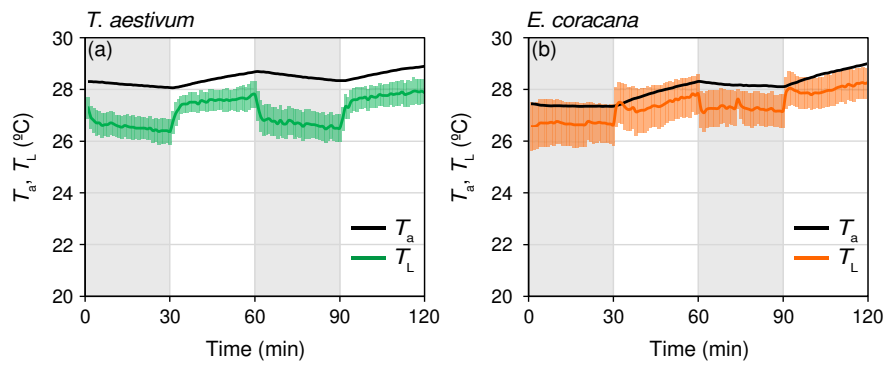

**Supplemental Fig. S10.** Changes in leaf temperature ( $T_L$ ) in the fluctuating light environments at 30-minute intervals in (a) *T. aestivum* and (b) *E. coracana*. Plants were grown under the same growth conditions as those used for the photosynthesis measurements. Measurements of  $T_L$  and air temperature ( $T_a$ ) were conducted for 2 hours. Data are the mean  $\pm$  SD ( $n = 3$ ).

**Supplemental Table S1.** Stomatal characteristics determined by the photosynthesis measurements in four C<sub>3</sub> species and five C<sub>4</sub> species.

| Species                   | N                                   | $r_{open}$<br>(mol m <sup>-2</sup> s <sup>-1</sup> ) | $G_{smax}$<br>(mol m <sup>-2</sup> s <sup>-1</sup> ) | $k_{open}$<br>(min) | $S_{Iopen}$<br>(mmol m <sup>-2</sup> s <sup>-2</sup> ) | $r_{close}$<br>(mol m <sup>-2</sup> s <sup>-1</sup> ) | $G_{smin}$<br>(mol m <sup>-2</sup> s <sup>-1</sup> ) | $k_{close}$<br>(min) | $S_{Iclose}$<br>(-mmol m <sup>-2</sup> s <sup>-2</sup> ) |             |
|---------------------------|-------------------------------------|------------------------------------------------------|------------------------------------------------------|---------------------|--------------------------------------------------------|-------------------------------------------------------|------------------------------------------------------|----------------------|----------------------------------------------------------|-------------|
| C <sub>3</sub>            | <i>Triticum aestivum</i>            | HN                                                   | 0.14 ± 0.05                                          | 0.38 ± 0.04         | 3.17 ± 0.21                                            | 0.47 ± 0.06                                           | 0.38 ± 0.04                                          | 0.15 ± 0.05          | 3.50 ± 0.44                                              | 0.46 ± 0.08 |
|                           |                                     | LN                                                   | 0.06 ± 0.01                                          | 0.23 ± 0.02         | 1.94 ± 0.34                                            | 0.61 ± 0.09                                           | 0.21 ± 0.02                                          | 0.04 ± 0.02          | 2.08 ± 0.41                                              | 0.58 ± 0.07 |
|                           | <i>Avena sativa</i>                 | HN                                                   | 0.33 ± 0.05                                          | 0.49 ± 0.03         | 3.46 ± 0.32                                            | 0.32 ± 0.05                                           | 0.49 ± 0.03                                          | 0.35 ± 0.03          | 3.81 ± 0.33                                              | 0.24 ± 0.03 |
|                           |                                     | LN                                                   | 0.29 ± 0.03                                          | 0.45 ± 0.01         | 3.62 ± 0.11                                            | 0.28 ± 0.04                                           | 0.45 ± 0.01                                          | 0.33 ± 0.02          | 4.45 ± 0.16                                              | 0.16 ± 0.01 |
|                           | <i>Hordeum vulgare</i>              | HN                                                   | 0.10 ± 0.01                                          | 0.34 ± 0.01         | 3.54 ± 0.07                                            | 0.42 ± 0.02                                           | 0.34 ± 0.01                                          | 0.11 ± 0.01          | 3.35 ± 0.18                                              | 0.43 ± 0.04 |
|                           |                                     | LN                                                   | 0.13 ± 0.03                                          | 0.34 ± 0.03         | 3.40 ± 0.24                                            | 0.38 ± 0.05                                           | 0.34 ± 0.03                                          | 0.14 ± 0.03          | 3.57 ± 0.45                                              | 0.41 ± 0.08 |
| <i>Lolium multiflorum</i> | HN                                  | 0.12 ± 0.01                                          | 0.29 ± 0.02                                          | 1.03 ± 0.21         | 1.34 ± 0.28                                            | 0.29 ± 0.02                                           | 0.10 ± 0.01                                          | 3.22 ± 0.20          | 0.37 ± 0.04                                              |             |
|                           | LN                                  | 0.23 ± 0.03                                          | 0.39 ± 0.02                                          | 1.95 ± 0.39         | 0.73 ± 0.18                                            | 0.39 ± 0.02                                           | 0.23 ± 0.04                                          | 3.68 ± 0.22          | 0.28 ± 0.06                                              |             |
| C <sub>4</sub>            | <i>Eleusine coracana</i>            | HN                                                   | 0.03 ± 0.00                                          | 0.16 ± 0.00         | 0.25 ± 0.03                                            | 3.50 ± 0.37                                           | 0.12 ± 0.01                                          | 0.02 ± 0.00          | 0.36 ± 0.05                                              | 1.90 ± 0.18 |
|                           |                                     | LN                                                   | 0.03 ± 0.00                                          | 0.10 ± 0.01         | 0.39 ± 0.06                                            | 1.47 ± 0.32                                           | 0.07 ± 0.01                                          | 0.02 ± 0.00          | 0.38 ± 0.05                                              | 0.85 ± 0.14 |
|                           | <i>Sorghum bicolor</i>              | HN                                                   | 0.03 ± 0.00                                          | 0.18 ± 0.01         | 1.88 ± 0.20                                            | 0.49 ± 0.05                                           | 0.18 ± 0.01                                          | 0.04 ± 0.00          | 1.10 ± 0.17                                              | 0.84 ± 0.08 |
|                           |                                     | LN                                                   | 0.03 ± 0.00                                          | 0.12 ± 0.02         | 2.01 ± 0.44                                            | 0.41 ± 0.16                                           | 0.13 ± 0.01                                          | 0.03 ± 0.00          | 0.85 ± 0.08                                              | 0.78 ± 0.09 |
|                           | <i>Panicum miliaceum</i>            | HN                                                   | 0.03 ± 0.00                                          | 0.11 ± 0.00         | 0.54 ± 0.06                                            | 1.07 ± 0.13                                           | 0.09 ± 0.00                                          | 0.02 ± 0.00          | 0.87 ± 0.17                                              | 0.68 ± 0.13 |
|                           |                                     | LN                                                   | 0.02 ± 0.00                                          | 0.07 ± 0.00         | 2.05 ± 0.24                                            | 0.15 ± 0.02                                           | 0.07 ± 0.00                                          | 0.02 ± 0.00          | 2.44 ± 0.28                                              | 0.13 ± 0.02 |
|                           | <i>Zea mays</i>                     | HN                                                   | 0.04 ± 0.00                                          | 0.15 ± 0.01         | 2.29 ± 0.37                                            | 0.37 ± 0.07                                           | 0.15 ± 0.01                                          | 0.04 ± 0.01          | 2.63 ± 0.31                                              | 0.26 ± 0.03 |
|                           |                                     | LN                                                   | 0.04 ± 0.00                                          | 0.09 ± 0.01         | 2.64 ± 0.35                                            | 0.13 ± 0.02                                           | 0.09 ± 0.01                                          | 0.05 ± 0.01          | 3.33 ± 0.50                                              | 0.09 ± 0.01 |
|                           | <i>Zea nicaraguensis</i>            | HN                                                   | 0.04 ± 0.00                                          | 0.17 ± 0.01         | 3.08 ± 0.37                                            | 0.30 ± 0.04                                           | 0.17 ± 0.01                                          | 0.05 ± 0.00          | 3.42 ± 0.29                                              | 0.23 ± 0.03 |
|                           |                                     | LN                                                   | 0.02 ± 0.00                                          | 0.06 ± 0.00         | 1.40 ± 0.15                                            | 0.20 ± 0.04                                           | 0.05 ± 0.00                                          | 0.02 ± 0.00          | 2.04 ± 0.32                                              | 0.13 ± 0.04 |
| Two-way ANOVA             | C <sub>3</sub> , C <sub>4</sub>     | ***                                                  | ***                                                  | ***                 | ns                                                     | ***                                                   | ***                                                  | ***                  | **                                                       |             |
|                           | N                                   | ns                                                   | ***                                                  | ns                  | **                                                     | ***                                                   | ns                                                   | ns                   | **                                                       |             |
|                           | C <sub>3</sub> , C <sub>4</sub> × N | ns                                                   | ns                                                   | ns                  | ns                                                     | ns                                                    | ns                                                   | ns                   | *                                                        |             |

See the main text for abbreviations. Data are the mean ± SE (n = 4). The effects of photosynthetic types (C<sub>3</sub> or C<sub>4</sub>), nitrogen (N) conditions (HN or LN), and their interaction on the characteristics were determined by two-way ANOVA (\*\*\* P < 0.001, \*\* P < 0.01, \* P < 0.05, ns P > 0.05).

**Supplemental Table S2.** Physiological and morphological characteristics of the leaves used for the photosynthesis measurements in four C<sub>3</sub> species and five C<sub>4</sub> species.

| Species                   | N                                   | LMA<br>(g m <sup>-2</sup> ) | N <sub>area</sub><br>(g N m <sup>-2</sup> ) | A <sub>max</sub><br>(μmol m <sup>-2</sup> s <sup>-1</sup> ) | SD (adaxial)<br>(mm <sup>-2</sup> ) | SD (abaxial)<br>(mm <sup>-2</sup> ) | SD <sub>mean</sub><br>(mm <sup>-2</sup> ) | GL (adaxial)<br>(μm) | GL (abaxial)<br>(μm) | GL <sub>mean</sub><br>(μm) |            |
|---------------------------|-------------------------------------|-----------------------------|---------------------------------------------|-------------------------------------------------------------|-------------------------------------|-------------------------------------|-------------------------------------------|----------------------|----------------------|----------------------------|------------|
| C <sub>3</sub>            | <i>Triticum aestivum</i>            | HN                          | 24.3 ± 1.4                                  | 1.02 ± 0.03                                                 | 17.6 ± 1.0                          | 54.3 ± 2.8                          | 39.7 ± 1.7                                | 47.0 ± 3.2           | 54.2 ± 1.2           | 52.6 ± 1.4                 | 53.4 ± 0.9 |
|                           |                                     | LN                          | 29.4 ± 1.8                                  | 0.62 ± 0.09                                                 | 11.8 ± 1.1                          | 38.8 ± 2.9                          | 45.4 ± 4.4                                | 42.1 ± 3.0           | 56.9 ± 1.3           | 60.3 ± 2.0                 | 58.6 ± 1.3 |
|                           | <i>Avena sativa</i>                 | HN                          | 22.9 ± 0.5                                  | 1.25 ± 0.02                                                 | 22.3 ± 1.1                          | 51.2 ± 3.2                          | 53.9 ± 1.8                                | 52.5 ± 2.0           | 52.2 ± 1.4           | 54.0 ± 1.8                 | 53.1 ± 1.2 |
|                           |                                     | LN                          | 19.0 ± 0.6                                  | 0.57 ± 0.03                                                 | 18.9 ± 0.5                          | 53.1 ± 1.6                          | 62.7 ± 2.7                                | 57.9 ± 2.5           | 51.4 ± 1.0           | 48.5 ± 0.8                 | 50.0 ± 0.8 |
|                           | <i>Hordeum vulgare</i>              | HN                          | 30.1 ± 0.5                                  | 1.68 ± 0.07                                                 | 18.7 ± 0.4                          | 45.7 ± 1.8                          | 44.9 ± 1.9                                | 45.3 ± 1.4           | 50.2 ± 1.0           | 53.2 ± 1.3                 | 51.7 ± 1.0 |
|                           |                                     | LN                          | 23.8 ± 0.9                                  | 0.36 ± 0.03                                                 | 14.5 ± 1.1                          | 78.1 ± 3.5                          | 76.1 ± 8.2                                | 77.1 ± 4.8           | 39.7 ± 0.9           | 41.3 ± 1.1                 | 40.5 ± 0.8 |
| <i>Lolium multiflorum</i> | HN                                  | 30.1 ± 1.0                  | 1.10 ± 0.05                                 | 15.0 ± 0.6                                                  | 96.9 ± 8.0                          | 44.7 ± 2.6                          | 70.8 ± 10.                                | 39.3 ± 0.1           | 43.5 ± 1.0           | 41.4 ± 0.8                 |            |
|                           | LN                                  | 26.8 ± 0.8                  | 0.57 ± 0.05                                 | 10.6 ± 0.7                                                  | 63.2 ± 7.5                          | 58.1 ± 9.7                          | 60.7 ± 6.6                                | 40.1 ± 2.4           | 39.0 ± 2.9           | 39.5 ± 1.9                 |            |
| C <sub>4</sub>            | <i>Eleusine coracana</i>            | HN                          | 28.3 ± 2.1                                  | 0.98 ± 0.05                                                 | 21.0 ± 1.0                          | 114. ± 6.9                          | 88.0 ± 3.9                                | 101. ± 6.5           | 33.5 ± 2.2           | 33.8 ± 1.0                 | 33.7 ± 1.2 |
|                           |                                     | LN                          | 27.3 ± 1.0                                  | 0.45 ± 0.04                                                 | 10.6 ± 0.8                          | 95.7 ± 9.7                          | 101. ± 4.9                                | 98.7 ± 5.9           | 33.1 ± 1.9           | 30.8 ± 1.0                 | 31.9 ± 1.1 |
|                           | <i>Sorghum bicolor</i>              | HN                          | 29.3 ± 1.0                                  | 0.94 ± 0.05                                                 | 24.2 ± 0.6                          | 98.3 ± 4.2                          | 114. ± 4.6                                | 106. ± 4.4           | 29.7 ± 0.6           | 34.3 ± 0.4                 | 32.0 ± 0.9 |
|                           |                                     | LN                          | 29.0 ± 0.7                                  | 0.78 ± 0.05                                                 | 19.7 ± 0.9                          | 96.0 ± 5.1                          | 107. ± 10.                                | 101. ± 6.5           | 29.3 ± 0.6           | 27.2 ± 1.5                 | 28.2 ± 0.9 |
|                           | <i>Panicum miliaceum</i>            | HN                          | 28.2 ± 0.9                                  | 0.75 ± 0.07                                                 | 15.5 ± 0.5                          | 99.4 ± 3.7                          | 83.5 ± 2.1                                | 91.5 ± 3.7           | 27.7 ± 0.6           | 30.5 ± 1.2                 | 29.1 ± 0.8 |
|                           |                                     | LN                          | 29.0 ± 1.5                                  | 0.31 ± 0.02                                                 | 11.2 ± 0.6                          | 64.4 ± 4.8                          | 86.3 ± 11.                                | 75.4 ± 7.7           | 26.6 ± 1.0           | 26.4 ± 0.7                 | 26.5 ± 0.6 |
|                           | <i>Zea mays</i>                     | HN                          | 28.9 ± 0.8                                  | 0.91 ± 0.08                                                 | 20.6 ± 1.2                          | 65.5 ± 2.1                          | 81.5 ± 2.3                                | 73.5 ± 3.4           | 45.5 ± 0.5           | 45.7 ± 1.6                 | 45.6 ± 0.8 |
|                           |                                     | LN                          | 26.9 ± 0.4                                  | 0.52 ± 0.04                                                 | 10.1 ± 1.2                          | 116. ± 3.2                          | 85.4 ± 10.                                | 100. ± 8.4           | 44.0 ± 1.0           | 43.7 ± 1.4                 | 43.9 ± 0.9 |
|                           | <i>Zea nicaraguensis</i>            | HN                          | 30.6 ± 0.8                                  | 1.06 ± 0.03                                                 | 22.2 ± 0.5                          | 42.1 ± 1.9                          | 70.9 ± 1.6                                | 56.5 ± 5.6           | 50.7 ± 1.1           | 47.3 ± 0.5                 | 49.0 ± 0.8 |
|                           |                                     | LN                          | 27.8 ± 1.6                                  | 0.28 ± 0.02                                                 | 6.9 ± 0.5                           | 54.7 ± 5.6                          | 67.4 ± 6.4                                | 61.0 ± 5.1           | 38.5 ± 1.8           | 41.2 ± 1.4                 | 39.8 ± 1.2 |
| Two-way ANOVA             | C <sub>3</sub> , C <sub>4</sub>     | ***                         | ***                                         | ns                                                          | ***                                 | ***                                 | ***                                       | ***                  | ***                  | ***                        |            |
|                           | N                                   | ns                          | ***                                         | ***                                                         | ns                                  | ns                                  | ns                                        | ns                   | *                    | ns                         |            |
|                           | C <sub>3</sub> , C <sub>4</sub> × N | ns                          | **                                          | *                                                           | ns                                  | ns                                  | ns                                        | ns                   | ns                   | ns                         |            |

See the main text for abbreviations. Data are the mean ± SE (n = 4). The effects of photosynthetic types (C<sub>3</sub> or C<sub>4</sub>), nitrogen (N) conditions (HN or LN), and their interaction on the characteristics were determined by two-way ANOVA (\*\*\* P < 0.001, \*\* P < 0.01, \* P < 0.05, ns P > 0.05).

**Supplemental Table S3.** Whole-plant water use characteristics determined by the continuous measurements of pot weight in the controlled fluctuating environment in four C<sub>3</sub> species and five C<sub>4</sub> species.

| Species                                 | N                                   | $r_{open}$<br>(mol m <sup>-2</sup> s <sup>-1</sup> ) | $G_{smax}$<br>(mol m <sup>-2</sup> s <sup>-1</sup> ) | $k_{open}$<br>(min) | $Sl_{open}$<br>(mmol m <sup>-2</sup> s <sup>-2</sup> ) | $r_{close}$<br>(mol m <sup>-2</sup> s <sup>-1</sup> ) | $G_{smin}$<br>(mol m <sup>-2</sup> s <sup>-1</sup> ) | $k_{close}$<br>(min) | $Sl_{close}$<br>(-mmol m <sup>-2</sup> s <sup>-2</sup> ) |
|-----------------------------------------|-------------------------------------|------------------------------------------------------|------------------------------------------------------|---------------------|--------------------------------------------------------|-------------------------------------------------------|------------------------------------------------------|----------------------|----------------------------------------------------------|
| C <sub>3</sub> <i>Triticum aestivum</i> | HN                                  | 0.046 ± 0.007                                        | 0.103 ± 0.007                                        | 3.14 ± 1.16         | 0.125 ± 0.043                                          | 0.104 ± 0.008                                         | 0.043 ± 0.010                                        | 5.04 ± 1.23          | 0.079 ± 0.030                                            |
|                                         | LN                                  | 0.043 ± 0.008                                        | 0.080 ± 0.004                                        | 1.43 ± 0.23         | 0.159 ± 0.040                                          | 0.079 ± 0.006                                         | 0.033 ± 0.008                                        | 3.99 ± 1.48          | 0.081 ± 0.037                                            |
| <i>Avena sativa</i>                     | HN                                  | –                                                    | –                                                    | –                   | –                                                      | –                                                     | –                                                    | –                    | –                                                        |
|                                         | LN                                  | –                                                    | –                                                    | –                   | –                                                      | –                                                     | –                                                    | –                    | –                                                        |
| <i>Hordeum vulgare</i>                  | HN                                  | 0.037 ± 0.005                                        | 0.069 ± 0.003                                        | 1.42 ± 0.37         | 0.140 ± 0.022                                          | 0.065 ± 0.004                                         | 0.032 ± 0.003                                        | 3.04 ± 0.41          | 0.067 ± 0.009                                            |
|                                         | LN                                  | 0.052 ± 0.018                                        | 0.089 ± 0.015                                        | 2.06 ± 0.76         | 0.107 ± 0.037                                          | 0.079 ± 0.026                                         | 0.043 ± 0.023                                        | 2.89 ± 1.47          | 0.096 ± 0.043                                            |
| <i>Lolium multiflorum</i>               | HN                                  | 0.043 ± 0.003                                        | 0.067 ± 0.003                                        | 0.83 ± 0.25         | 0.182 ± 0.025                                          | 0.053 ± 0.003                                         | 0.026 ± 0.001                                        | 1.56 ± 0.34          | 0.112 ± 0.026                                            |
|                                         | LN                                  | 0.055 ± 0.003                                        | 0.087 ± 0.004                                        | 1.73 ± 0.74         | 0.133 ± 0.056                                          | 0.083 ± 0.004                                         | 0.048 ± 0.005                                        | 3.18 ± 0.69          | 0.071 ± 0.018                                            |
| C <sub>4</sub> <i>Eleusine coracana</i> | HN                                  | 0.013 ± 0.001                                        | 0.059 ± 0.004                                        | 0.59 ± 0.12         | 0.488 ± 0.111                                          | 0.038 ± 0.001                                         | 0.013 ± 0.000                                        | 0.59 ± 0.08          | 0.266 ± 0.035                                            |
|                                         | LN                                  | 0.012 ± 0.001                                        | 0.039 ± 0.003                                        | 0.88 ± 0.05         | 0.185 ± 0.027                                          | 0.026 ± 0.002                                         | 0.012 ± 0.000                                        | 0.74 ± 0.22          | 0.129 ± 0.048                                            |
| <i>Sorghum bicolor</i>                  | HN                                  | 0.023 ± 0.001                                        | 0.048 ± 0.002                                        | 0.47 ± 0.19         | 0.355 ± 0.073                                          | 0.039 ± 0.002                                         | 0.019 ± 0.001                                        | 0.52 ± 0.08          | 0.243 ± 0.035                                            |
|                                         | LN                                  | 0.021 ± 0.001                                        | 0.048 ± 0.001                                        | 0.33 ± 0.08         | 0.527 ± 0.107                                          | 0.041 ± 0.002                                         | 0.018 ± 0.001                                        | 0.38 ± 0.07          | 0.365 ± 0.064                                            |
| <i>Panicum miliaceum</i>                | HN                                  | 0.011 ± 0.000                                        | 0.037 ± 0.001                                        | 0.47 ± 0.14         | 0.352 ± 0.093                                          | 0.022 ± 0.001                                         | 0.009 ± 0.000                                        | 0.62 ± 0.23          | 0.150 ± 0.104                                            |
|                                         | LN                                  | 0.013 ± 0.000                                        | 0.039 ± 0.002                                        | 0.63 ± 0.18         | 0.267 ± 0.073                                          | 0.033 ± 0.001                                         | 0.010 ± 0.000                                        | 0.61 ± 0.11          | 0.230 ± 0.044                                            |
| <i>Zea mays</i>                         | HN                                  | 0.018 ± 0.002                                        | 0.037 ± 0.003                                        | 0.38 ± 0.17         | 0.353 ± 0.155                                          | 0.032 ± 0.002                                         | 0.016 ± 0.002                                        | 0.36 ± 0.06          | 0.269 ± 0.072                                            |
|                                         | LN                                  | 0.017 ± 0.004                                        | 0.028 ± 0.003                                        | 0.69 ± 0.14         | 0.093 ± 0.014                                          | 0.027 ± 0.003                                         | 0.019 ± 0.004                                        | 0.44 ± 0.11          | 0.119 ± 0.025                                            |
| <i>Zea nicaraguensis</i>                | HN                                  | 0.018 ± 0.002                                        | 0.051 ± 0.001                                        | 0.75 ± 0.12         | 0.278 ± 0.057                                          | 0.037 ± 0.001                                         | 0.016 ± 0.000                                        | 0.56 ± 0.11          | 0.234 ± 0.042                                            |
|                                         | LN                                  | –                                                    | –                                                    | –                   | –                                                      | –                                                     | –                                                    | –                    | –                                                        |
| Two-way ANOVA                           | C <sub>3</sub> , C <sub>4</sub>     | ***                                                  | ***                                                  | ***                 | ***                                                    | ***                                                   | ***                                                  | ***                  | ***                                                      |
|                                         | N                                   | **                                                   | ns                                                   | ns                  | ***                                                    | ns                                                    | *                                                    | ns                   | ns                                                       |
|                                         | C <sub>3</sub> , C <sub>4</sub> × N | ***                                                  | ns                                                   | ns                  | **                                                     | *                                                     | **                                                   | ns                   | ns                                                       |

See the main text for abbreviations. Data are the mean of twelve measurements during the 12-hour light period ± SE. The effects of photosynthetic types (C<sub>3</sub> or C<sub>4</sub>), nitrogen (N) conditions (HN or LN), and their interaction on the characteristics were determined by two-way ANOVA (\*\*\* P < 0.001, \*\* P < 0.01, \* P < 0.05, ns P > 0.05). The results obtained in the fluctuating light environments at 30-minute intervals are shown. Data for *A. sativa* grown under HN and *Z. nicaraguensis* grown under HN and LN were not shown since we could not fit the temporal responses of  $g_s$  to the equations due to small differences  $G_{smax}$  and  $G_{smin}$  (Figs. S4c, S5i).
